# Supplementary material for: Stability and Requirement for Thiamin in a Cell Culture Feed Used to Produce New Biological Entities
Source: MDPI journal article supplement (doi:10.3390/cells12020334), 2023-01-16
Supplement: s1 [file s1]

## Supplementary materials

Figure S1: Example of Tier 1 level identification of thiamin

Experimental data obtained in the feed (green) compared to the data obtained for the standard (blue) for feature  $m/z = 265.1117$ ,  $RT = 2.56$  min, tier 1, identified as compound **1**.

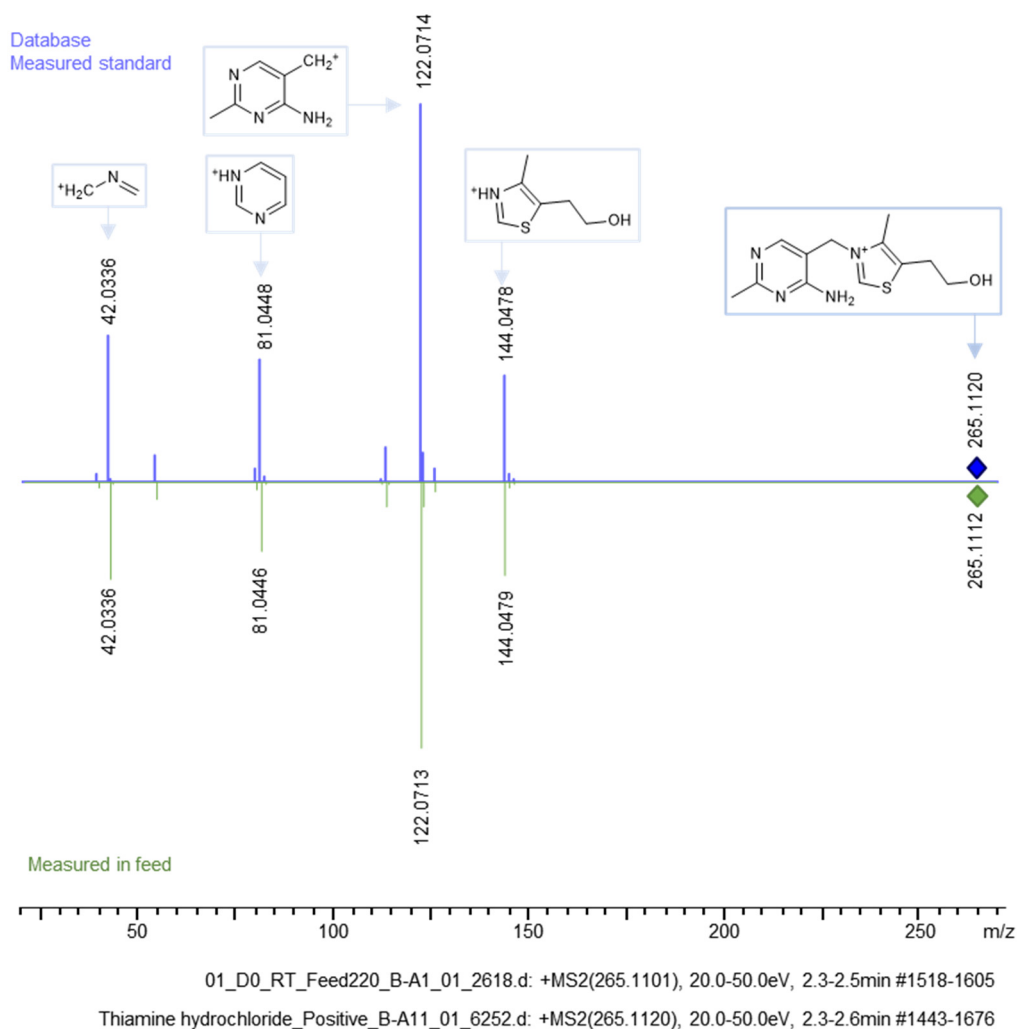

Heatmap of thiamin degradation products in each component specific deficient feed (-) or feed with addition of specific components (+). PTyr abbreviates phosphotyrosine. Data of vitamin and other component specific deficient feeds are not shown since they were not identified as interaction partner. Light blue color indicates that the feature was not detected at all or only background signal was detected. Change from light to dark blue indicates an increase in feature abundance.

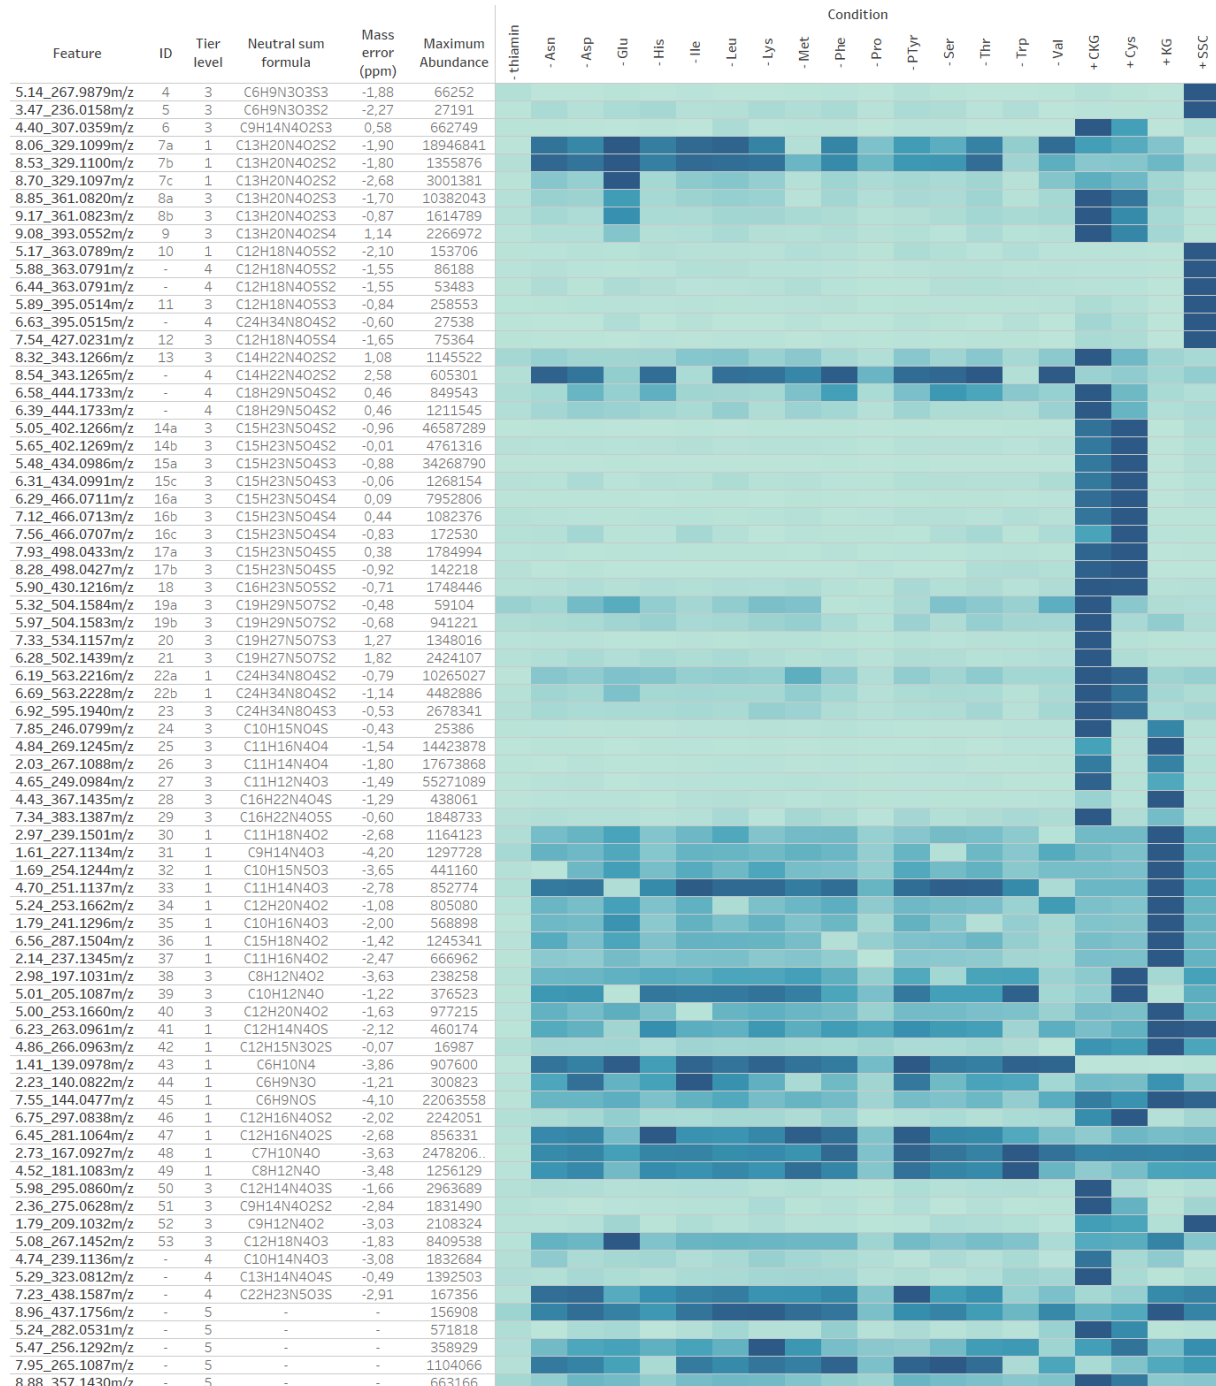

**Figure S3: Cell performance of clone 3 and 4 and day 12 cQAs of mAb 3 and 4**

Cell performance of clone 3 and 4 during the FB and day 12 cQA analysis of mAb3 and mAb4. A) Viable cell density, B) viability, C) titer, D) relative quantification of intact recombinant protein and total low as well as high molecular weight forms (LMW, HMW), E) relative quantification of charge variants, and F) relative quantification of total fucosylation (Fuc), total high-mannose (Man), total galactosylation (Gal), total sialylation (Sial), and total N-acetylglucosamine (GlcNAc) species.  $n_{\text{cell performance}}=4$  and  $n_{\text{cQAs}}=3$ , error bars represent standard error of mean.

Charge variants of the fusion protein were not characterized because there is no analysis method available in the laboratory yet.

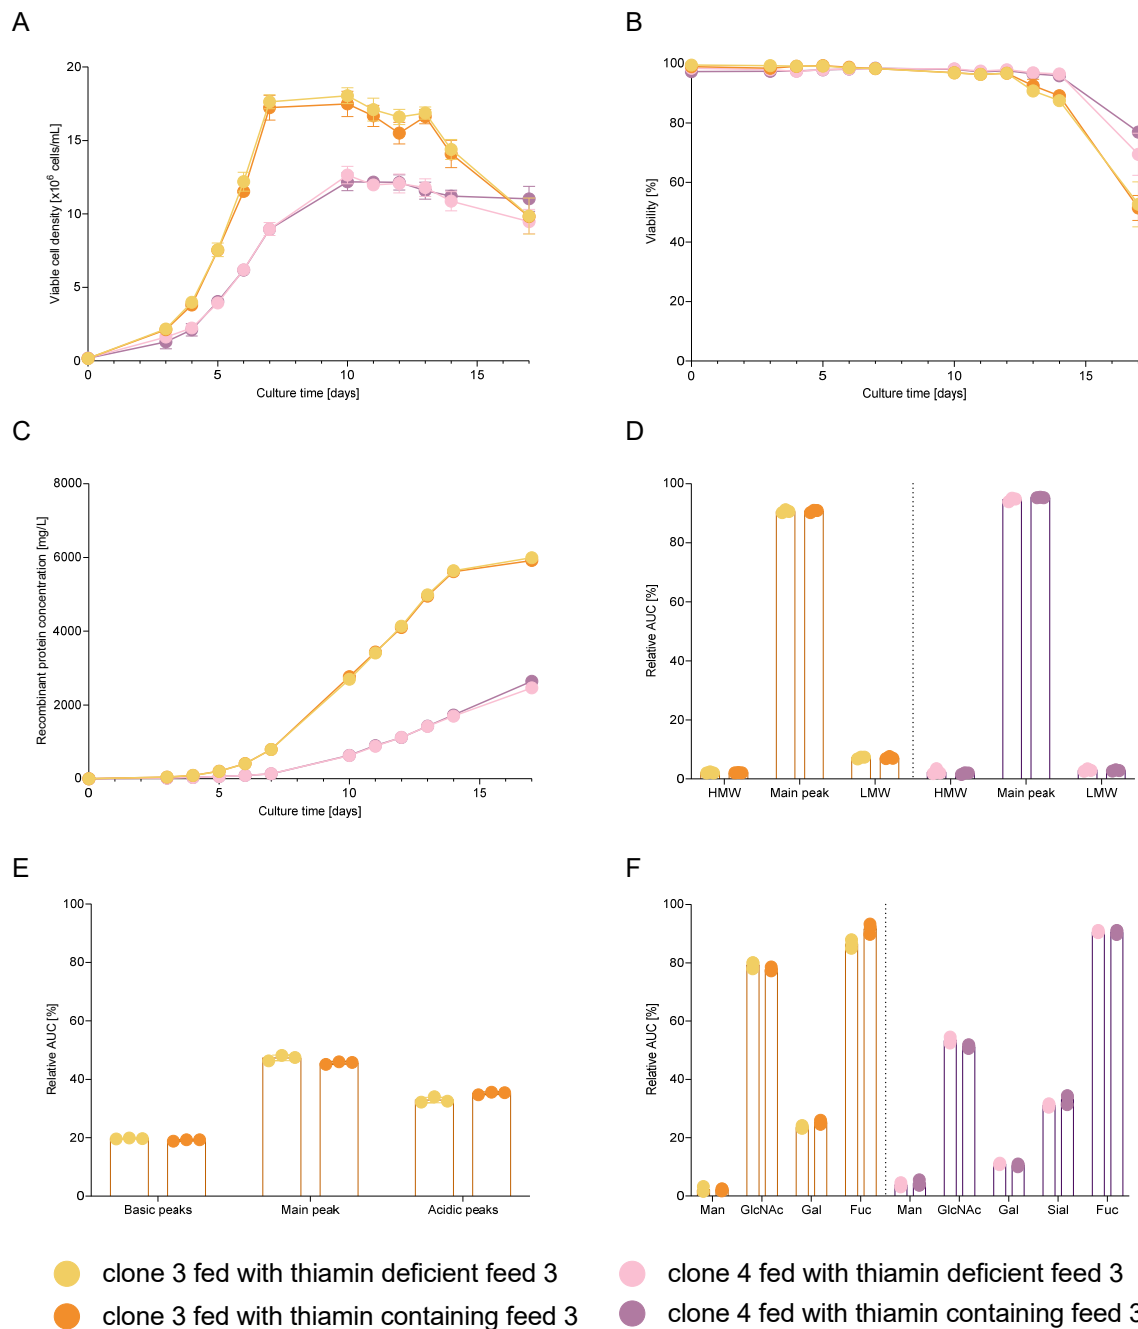

Figure S4: Thiamin phosphate species of clone 3 and 4

Thiamin species detected extra- and intracellularly during the FB. Lighter color indicates the conditions without thiamin in feed 3. Darker color indicates the conditions containing thiamin in feed 3. N=3. Timepoint and lowest thiamin abundance highlighted for conditions fed with a thiamin deficient feed.

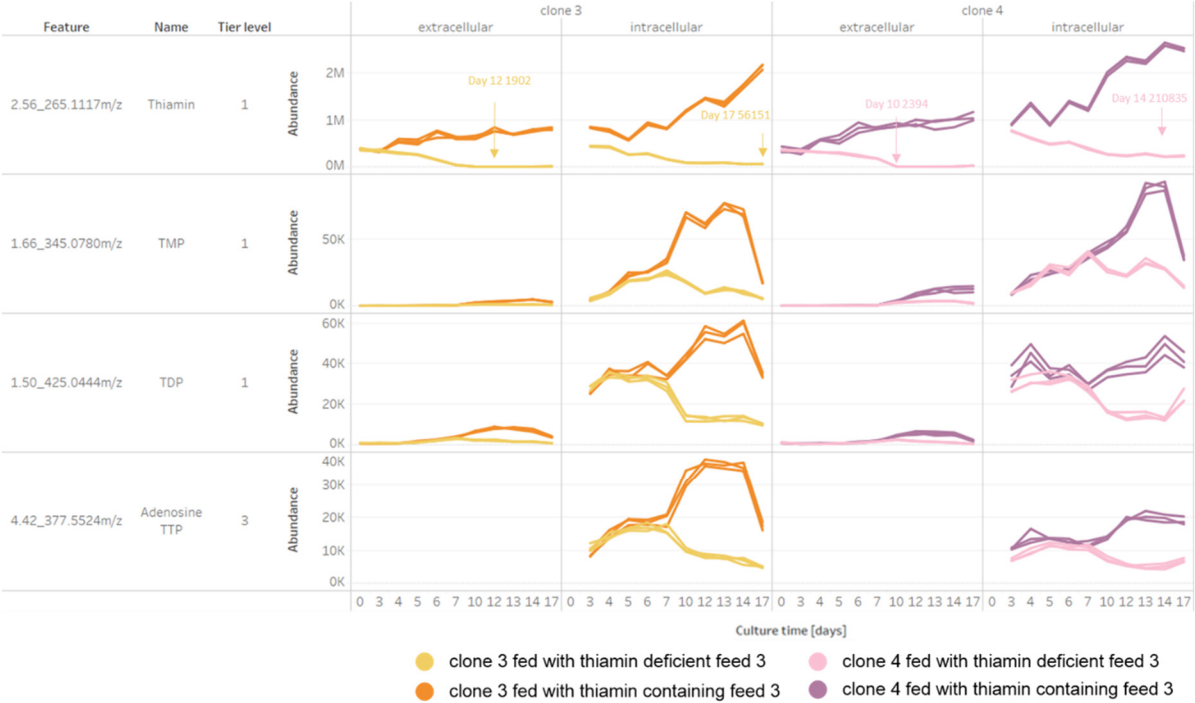

## Figure S5: Intracellular and not yet presented features affected by thiamin removal

Structures of features that were not yet presented and found with intracellular metabolomics. Component specific information are presented as [Identifier; interaction partner if found or not available (na); tier level]. For **65** and **67** Leu was presented as interaction partner and for **66** and **68** Val was presented as interaction partner. Red highlights structural differences compared to thiamin.

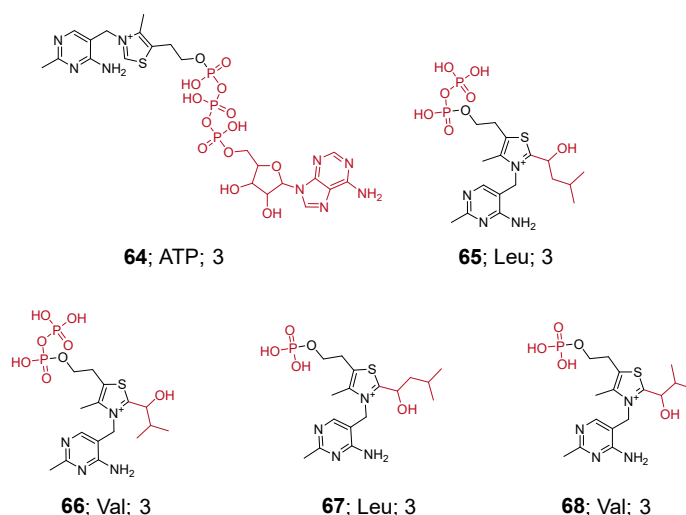

## Section S1: LC-MS structure/tier assignments for features

Various levels of confidence were assigned to the annotations based on the initial recommendation of Sumner et al. [14] and some further published guidance document [15]. Briefly, tier 1 identification level was given to features where RT, precursor mass, and fragmentation pattern matched a commercially available standard that was measured on the same LC-MS equipment and with the same method. Tier 2 annotations were obtained for features identified by comparing the MS/MS fragmentation pattern with a spectral library (HMDB, METLIN or NIST). Features were annotated as a tier 3 when a tentative structure matched the precursor mass and the MS/MS fragmentation data could be annotated manually. Tier 4 correspond to features for which the precursor mass and the isotopic pattern were matched with a sum formula. Finally, tier 5 were only identified by a unique RT and precursor mass but no tentative structure or sum formula can be reported.

Table S1: Compounds used as standards for tier 1 feature identification.

| Description                                                                   | CAS         | ID | # Catalogue     | Supplier                   |
|-------------------------------------------------------------------------------|-------------|----|-----------------|----------------------------|
| Thiamine chloride hydrochloride                                               | 67-03-8     | 1  | 500923          | Merck                      |
| Thiamin methyl disulfide                                                      | 2281-20-1   | 7  | FCG4202889027   | Santai Labs                |
| Thiamine-S-sulfonate                                                          | 3889-45-0   | 10 | CP-19035281     | Chempartner                |
| Thiamin disulfide                                                             | 67-16-3     | 22 | T-8410          | TLC Standards              |
| 2-[[[(4-amino-2-methylpyrimidin-5-yl)methyl]amino]-3-methylbutanoic acid      | No CAS      | 30 | CSCS06256078232 | Chemspace                  |
| 2-[[[(4-amino-2-methylpyrimidin-5-yl)methyl]amino]-3-hydroxypropanoic acid    | No CAS      | 31 | CSC06256078239  | Chemspace                  |
| 2-[[[(4-amino-2-methylpyrimidin-5-yl)methyl]amino]-3-carbamoylpropanoic acid  | No CAS      | 32 | CSCS06256078247 | Chemspace                  |
| 1-[(4-amino-2-methylpyrimidin-5-yl)methyl]-5-oxopyrrolidine-2-carboxylic acid | No CAS      | 33 | CSCS06256078234 | Chemspace                  |
| 2-[[[(4-amino-2-methylpyrimidin-5-yl)methyl]amino]-3-methylpentanoic acid     | No CAS      | 34 | CSCS06256078241 | Chemspace                  |
| 2-[[[(4-amino-2-methylpyrimidin-5-yl)methyl]amino]-3-hydroxybutanoic acid     | No CAS      | 35 | CSCS02401040605 | Chemspace                  |
| 2-[[[(4-amino-2-methylpyrimidin-5-yl)methyl]amino]-3-phenylpropanoic acid     | No CAS      | 36 | CSCS06256078209 | Chemspace                  |
| 1-[(4-amino-2-methylpyrimidin-5-yl)methyl]pyrrolidine-3-carboxylic acid       | No CAS      | 37 | CSMS05241890416 | Chemspace                  |
| Thiochrome                                                                    | 92-35-3     | 41 | T7891           | Sigma                      |
| Oxythiamin                                                                    | 136-16-3    | 42 | O4000           | Sigma                      |
| 4-Amino-5-aminomethyl-2-methylpyrimidine                                      | 95-02-3     | 43 | QA-1255         | Combi-Blocks               |
| Toxopyrimidine                                                                | 73-67-6     | 44 | T686980         | Toronto Research Chemicals |
| Sulfurol                                                                      | 137-00-8    | 45 | W320404         | Sigma                      |
| Thioxothiamine                                                                | 299-35-4    | 46 | PHR1759         | Sigma                      |
| Oxothiamin                                                                    | 755708-63-5 | 47 | 375.365         | Chemcube                   |
| 4-Amino-5-(formamidomethyl)-2-methylpyrimidine                                | 1886-34-6   | 48 | A609675         | Toronto Research Chemicals |
| N-[(4-Amino-2-methylpyrimidin-5-yl)methyl]acetamide                           | 23676-63-3  | 49 | CSC000092869    | Chemspace                  |
| Thiamin monophosphate chloride dihydrate                                      | 273724-21-3 | 54 | T8637           | Sigma                      |
| Thiamine pyrophosphate                                                        | 154-87-0    | 55 | C8754           | Sigma                      |
| Inosine                                                                       | 58-63-9     | 62 | I4125           | Sigma                      |

**Table S2: Extracellular features affected by thiamin removal**

Extracellular metabolomics applied to supernatant during a FB experiment. Area under the curve of interesting feature abundance over time (days 0-17) of thiamin free feed conditions (-) and the respective control condition (+) for all tested clones.

| Feature          | ID  | Tier level | Ion species | Neutral sum formula | Mass error (ppm) | Maximum Abundance | clone 1 |          | clone 2 |          | clone 3 |          | clone 4 |          |
|------------------|-----|------------|-------------|---------------------|------------------|-------------------|---------|----------|---------|----------|---------|----------|---------|----------|
|                  |     |            |             |                     |                  |                   | -       | +        | -       | +        | -       | +        | -       | +        |
| 2.56_265.1117m/z | 1   | 1          | M+          | C12H16N4OS          | -0.40            | 1211263           | 6012257 | 35381216 | 6837945 | 32344724 | 6142033 | 31953773 | 7405114 | 38734594 |
| 6.23_263.0961m/z | 41  | 1          | M+H         | C12H14N4OS          | -2.12            | 119148            | 32615   | 112405   | 75119   | 1545730  | 49446   | 159461   | 93085   | 2051531  |
| 3.77_309.1380m/z | 57  | 3          | M+          | C14H20N4O2S         | -1.69            | 113029            | 283756  | 2228717  | 95496   | 953453   | 93475   | 1559486  | 90892   | 900172   |
| 5.36_278.6131m/z | -   | 5          | M+2H        | -                   | -                | 41763             | 18770   | 26532    | 91960   | 335720   | 68687   | 171141   | 60354   | 164833   |
| 6.97_351.1851m/z | 61a | 3          | M+          | C17H26N4O2S         | -1.08            | 30236             | 203811  | 667426   | 121081  | 340519   | 102628  | 352642   | 137801  | 367048   |
| 4.43_367.1435m/z | 28  | 3          | M+H         | C16H22N4O4S         | -1.29            | 29372             | 95727   | 322285   | 50215   | 345648   | 71305   | 493850   | 80365   | 316088   |
| 5.49_307.1224m/z | 56  | 3          | M+          | C14H18N4O2S         | -1.51            | 19501             | 95003   | 322195   | 65742   | 218237   | 74855   | 289814   | 67311   | 183092   |
| 5.05_402.1266m/z | 14a | 3          | M+H         | C15H23N5O4S2        | -0.96            | 19307             | 42187   | 76876    | 55223   | 208317   | 47105   | 80861    | 63525   | 344523   |
| 1.66_345.0780m/z | 54  | 1          | M+          | C12H17N4O4PS        | -1.86            | 13369             | 23727   | 48888    | 79044   | 270562   | 26577   | 86733    | 76853   | 233063   |
| 5.84_337.1694m/z | 60a | 3          | M+          | C16H24N4O2S         | -1.19            | 11423             | 41375   | 211167   | 19810   | 114512   | 19387   | 107273   | 34075   | 117993   |
| 2.03_267.1088m/z | 26  | 3          | M+H         | C11H14N4O4          | -1.80            | 11275             | 72672   | 138206   | 99259   | 224667   | 95552   | 250170   | 82048   | 198950   |
| 5.08_267.1452m/z | 53  | 3          | M+H         | C12H18N4O3          | -1.83            | 10380             | 43087   | 131939   | 57318   | 225557   | 50086   | 149490   | 59185   | 250881   |

### Table S3: Intracellular features affected by thiamin removal

Intracellular metabolomics applied to CHO cell lysates during a FB experiment. Area under the curve of interesting feature abundance over time (days 0-17) of thiamin free feed conditions (-) and the respective control condition (+) for all tested clones.



| Feature          | ID  | Tier level | Ion species | Neutral sum formula | Mass error (ppm) | Maximum Abundance | clone 1 |          | clone 2 |          | clone 3 |          | clone 4 |          |
|------------------|-----|------------|-------------|---------------------|------------------|-------------------|---------|----------|---------|----------|---------|----------|---------|----------|
|                  |     |            |             |                     |                  |                   | -       | +        | -       | +        | -       | +        | -       | +        |
| 2.56_265.1117m/z | 1   | 1          | M+          | C12H16N4O5          | -0.40            | 5976252           | 4338036 | 31023882 | 2827786 | 17828654 | 2135250 | 17407778 | 4827873 | 26049518 |
| 5.39_269.0886m/z | 62  | 1          | M+H         | C10H12N4O5          | 0.07             | 1257920           | 2407631 | 2685790  | 4376782 | 8307095  | 2477696 | 2812657  | 4716950 | 8302720  |
| 3.77_309.1380m/z | 57  | 3          | M+          | C14H20N4O2S         | -1.69            | 1042389           | 375172  | 4389220  | 60354   | 905011   | 67028   | 1391287  | 103537  | 1539703  |
| 2.73_167.0927m/z | 48  | 1          | M+H         | C7H10N4O            | -3.63            | 659848            | 1108354 | 2363571  | 1369413 | 2849585  | 1218757 | 2636053  | 1414539 | 2713394  |
| 6.61_402.2119m/z | -   | 5          | M+2H        | -                   | -                | 430873            | 1925591 | 2689069  | 1300636 | 2353346  | 665951  | 1339066  | 1798006 | 2502650  |
| 6.27_635.3267m/z | -   | 5          | M+H         | -                   | -                | 290931            | 814089  | 1487748  | 600025  | 1616359  | 232368  | 687749   | 901480  | 1917782  |
| 3.66_268.1405m/z | -   | 5          | M+H         | -                   | -                | 275161            | 667490  | 723704   | 353286  | 787630   | 158438  | 259864   | 243368  | 569009   |
| 4.43_367.1435m/z | 28  | 3          | M+H         | C16H22N4O4S         | -1.29            | 206316            | 201423  | 1123948  | 70427   | 1165169  | 94744   | 1412937  | 163362  | 1153424  |
| 1.97_389.1044m/z | 58  | 3          | M+          | C14H21N4O5PS        | -0.99            | 183437            | 710816  | 1713870  | 320740  | 876574   | 217376  | 674013   | 771878  | 1696562  |
| 8.39_534.2547m/z | -   | 5          | M+2H        | -                   | -                | 169204            | 677371  | 991472   | 517935  | 1017696  | 188386  | 421251   | 656823  | 1004866  |
| 5.49_307.1224m/z | 56  | 3          | M+          | C14H18N4O2S         | -1.51            | 158610            | 124312  | 769385   | 22805   | 265878   | 25662   | 385716   | 47251   | 353672   |
| 5.82_381.7225m/z | -   | 5          | M+2H        | -                   | -                | 131602            | 258754  | 531704   | 175589  | 548156   | 66806   | 191371   | 391523  | 822776   |
| 1.50_425.0444m/z | 55  | 1          | M+          | C12H18N4O7P2S       | -0.03            | 125961            | 311951  | 831740   | 337632  | 779089   | 277522  | 599353   | 302769  | 536825   |
| 1.71_469.0711m/z | 59  | 3          | M+          | C14H22N4O8P2S       | 0.78             | 120990            | 477143  | 973390   | 319751  | 503974   | 270133  | 409232   | 393645  | 566435   |
| 8.32_421.2558m/z | -   | 5          | M+H         | -                   | -                | 120164            | 531     | 1273     | 302     | 870      | 82      | 398      | 180572  | 485180   |
| 7.23_351.1853m/z | 61b | 3          | M+          | C17H26N4O2S         | -1.30            | 109623            | 102383  | 350741   | 5230    | 26240    | 9971    | 42791    | 18075   | 48571    |
| 1.41_139.0978m/z | 43  | 1          | M+H         | C6H10N4             | -1.21            | 108612            | 120295  | 425691   | 133409  | 389163   | 212454  | 774723   | 139632  | 488359   |
| 5.10_348.0712m/z | 63  | 3          | M+H         | C10H14N5O7P         | 0.89             | 106954            | 273723  | 335883   | 299178  | 705004   | 192445  | 370376   | 356692  | 549963   |
| 5.98_337.1694m/z | 60b | 3          | M+          | C16H24N4O2S         | -1.19            | 100221            | 89507   | 366697   | 3232    | 26936    | 3110    | 35533    | 21081   | 64118    |
| 1.66_345.0780m/z | 54  | 1          | M+          | C12H17N4O4PS        | -1.86            | 90466             | 341017  | 739660   | 238969  | 618932   | 200546  | 633231   | 364864  | 674185   |
| 9.13_439.7171m/z | -   | 5          | M+2H        | -                   | -                | 90039             | 140997  | 296246   | 30382   | 186932   | 11494   | 61238    | 225641  | 691527   |
| 8.16_253.1657m/z | -   | 5          | M+H         | -                   | -                | 85748             | 204835  | 374274   | 145849  | 203465   | 158921  | 229996   | 151464  | 230802   |
| 6.27_511.1183m/z | 65  | 3          | M+          | C17H28N4O8P2S       | 0.44             | 74831             | 156869  | 458359   | 64968   | 115704   | 60261   | 82183    | 112126  | 184409   |
| 7.55_144.0477m/z | 45  | 1          | M+H         | C6H9NOS             | -4.10            | 58960             | 30949   | 166575   | 12389   | 61710    | 22174   | 95025    | 24352   | 106568   |
| 5.75_407.2292m/z | -   | 5          | M+H         | -                   | -                | 58296             | 189480  | 285766   | 136241  | 191154   | 80060   | 114160   | 159584  | 191208   |
| 4.42_377.5524m/z | 64  | 3          | M+2H        | C22H30N9O13P3S      | 0.83             | 54863             | 101654  | 249337   | 86415   | 253599   | 151887  | 362374   | 109976  | 221374   |
| 7.84_327.1496m/z | -   | 5          | M+H         | -                   | -                | 54430             | 34594   | 150989   | 12087   | 100766   | 10396   | 85986    | 25118   | 102465   |
| 4.84_269.1245m/z | 25  | 3          | M+H         | C11H16N4O4          | -1.54            | 54295             | 70791   | 116967   | 21022   | 41479    | 32355   | 77947    | 45462   | 65986    |
| 4.68_251.1664m/z | -   | 5          | M+2H        | -                   | -                | 50262             | 58980   | 129137   | 108652  | 340397   | 24362   | 109837   | 186889  | 368993   |
| 5.72_385.7173m/z | -   | 5          | M+2H        | -                   | -                | 49714             | 143627  | 248427   | 186141  | 372517   | 53621   | 135101   | 235276  | 270238   |
| 3.04_224.0951m/z | -   | 5          | M+H         | -                   | -                | 49260             | 91870   | 177706   | 25867   | 49902    | 43308   | 82230    | 10789   | 21889    |
| 5.08_267.1452m/z | 53  | 3          | M+H         | C12H18N4O3          | -1.83            | 48659             | 22960   | 174538   | 17963   | 182167   | 14663   | 138715   | 18956   | 208199   |
| 8.63_373.7135m/z | -   | 5          | M+2H        | -                   | -                | 45581             | 1228    | 1624     | 112     | 788      | 257     | 406      | 88125   | 271229   |
| 6.55_431.1516m/z | 67  | 3          | M+          | C17H27N4O5PS        | -0.53            | 42319             | 106466  | 337084   | 199050  | 73298    | 15852   | 45241    | 72724   | 210768   |
| 9.08_491.7518m/z | -   | 5          | M+2H        | -                   | -                | 42280             | 129153  | 210679   | 229964  | 365764   | 84621   | 284282   | 174450  | 155577   |
| 8.83_405.7347m/z | -   | 5          | M+2H        | -                   | -                | 38680             | 44903   | 64697    | 39009   | 88628    | 17314   | 28215    | 106997  | 187917   |
| 5.61_279.6208m/z | -   | 5          | M+2H        | -                   | -                | 38631             | 7462    | 17200    | 19115   | 65860    | 8975    | 34203    | 20139   | 52026    |
| 1.94_291.6536m/z | -   | 5          | M+2H        | -                   | -                | 37907             | 70457   | 137898   | 177925  | 306795   | 39309   | 137759   | 108782  | 159350   |
| 8.76_564.3230m/z | -   | 5          | M+2H        | -                   | -                | 37526             | 25200   | 56774    | 26584   | 176160   | 3533    | 43100    | 38044   | 109738   |
| 1.79_209.1032m/z | 52  | 3          | M+H         | C9H12N4O2           | -3.03            | 36341             | 44710   | 171076   | 30874   | 109246   | 24223   | 138396   | 50072   | 214781   |
| 6.23_263.0961m/z | 41  | 1          | M+H         | C12H14N4O5          | -2.12            | 35003             | 10845   | 137814   | 10483   | 78889    | 11186   | 107384   | 12156   | 100852   |
| 4.99_330.2013m/z | -   | 5          | M+2H        | -                   | -                | 34394             | 29079   | 76151    | 30302   | 140941   | 8048    | 46000    | 92272   | 250277   |
| 8.30_415.7116m/z | -   | 5          | M+2H        | -                   | -                | 34309             | 83989   | 140484   | 162037  | 300611   | 46151   | 151880   | 193224  | 232956   |
| 4.76_279.6773m/z | -   | 5          | M+2H        | -                   | -                | 32428             | 49259   | 84642    | 72696   | 226200   | 22943   | 76639    | 136585  | 257060   |
| 6.81_460.7207m/z | -   | 5          | M+2H        | -                   | -                | 31118             | 38589   | 100239   | 45733   | 197572   | 4488    | 37824    | 41754   | 122196   |
| 5.65_338.5182m/z | -   | 5          | M+H         | -                   | -                | 30716             | 87945   | 148795   | 81074   | 215266   | 26953   | 93285    | 78437   | 162463   |
| 8.98_479.7429m/z | -   | 5          | M+2H        | -                   | -                | 29977             | 2586    | 7497     | 3899    | 62380    | 1101    | 17870    | 50043   | 148297   |
| 5.29_432.2278m/z | -   | 5          | M+H         | -                   | -                | 29095             | 29743   | 80317    | 4472    | 43833    | 2117    | 12058    | 68454   | 210291   |
| 7.68_424.1806m/z | -   | 5          | M+H         | -                   | -                | 27931             | 198460  | 122021   | 26041   | 2782     | 24793   | 3051     | 43480   | 7987     |
| 9.08_559.3209m/z | -   | 5          | M+2H        | -                   | -                | 27778             | 52826   | 105817   | 104059  | 255190   | 29761   | 140737   | 53469   | 91463    |
| 8.64_435.2121m/z | -   | 5          | M+2H        | -                   | -                | 25677             | 64846   | 108397   | 107093  | 265394   | 32087   | 139256   | 108017  | 151577   |
| 7.67_395.2171m/z | -   | 5          | M+2H        | -                   | -                | 25674             | 11076   | 74791    | 34399   | 134517   | 1104    | 13143    | 66458   | 142534   |
| 5.19_497.1030m/z | 66  | 3          | M+          | C16H26N4O8P2S       | 1.01             | 24984             | 29693   | 124462   | 5206    | 14413    | 4105    | 6205     | 9899    | 26557    |
| 8.81_480.2335m/z | -   | 5          | M+2H        | -                   | -                | 23856             | 54708   | 113513   | 69204   | 194945   | 11869   | 81185    | 73208   | 122844   |
| 9.08_605.9692m/z | -   | 5          | M+H         | -                   | -                | 23777             | 57277   | 98680    | 11906   | 48318    | 8337    | 23639    | 68572   | 152624   |
| 5.26_373.2560m/z | -   | 5          | M+H         | -                   | -                | 23767             | 17865   | 46694    | 27402   | 133777   | 2052    | 29838    | 60247   | 152517   |
| 7.66_526.6204m/z | -   | 5          | M+H         | -                   | -                | 23429             | 21399   | 102053   | 99394   | 134522   | 920     | 12565    | 65853   | 134572   |
| 8.23_345.1918m/z | -   | 5          | M+2H        | -                   | -                | 23272             | 30604   | 68036    | 99621   | 207968   | 12026   | 82294    | 77017   | 94632    |
| 5.34_328.6776m/z | -   | 5          | M+2H        | -                   | -                | 23157             | 47566   | 111438   | 42015   | 150459   | 6427    | 55391    | 65863   | 133613   |
| 5.54_342.8812m/z | -   | 5          | M+H         | -                   | -                | 22503             | 17982   | 65850    | 17628   | 88824    | 1085    | 11166    | 47671   | 141093   |
| 9.08_559.5721m/z | -   | 5          | M+2H        | -                   | -                | 22134             | 43943   | 79496    | 86220   | 206733   | 21991   | 113614   | 37692   | 63912    |
| 6.44_343.1978m/z | -   | 5          | M+H         | -                   | -                | 22094             | 20570   | 63563    | 14180   | 63395    | 1350    | 10059    | 63804   | 140952   |
| 1.66_279.1275m/z | -   | 5          | M+H         | -                   | -                | 20633             | 1360    | 3434     | 1216    | 26322    | 486     | 13345    | 809     | 19527    |
| 5.43_410.1594m/z | -   | 5          | M+H         | -                   | -                | 20556             | 5411    | 16804    | 3788    | 13481    | 4197    | 15878    | 11032   | 23952    |
| 2.38_317.2188m/z | -   | 5          | M+H         | -                   | -                | 20191             | 811     | 418      | 0       | 0        | 0       | 0        | 11353   | 74727    |
| 8.48_349.1695m/z | -   | 5          | M+H         | -                   | -                | 19118             | 34440   | 89954    | 6086    | 44503    | 7732    | 41564    | 20751   | 86793    |
| 9.13_450.7082m/z | -   | 5          | M+2H        | -                   | -                | 18998             | 32934   | 61172    | 3786    | 40140    | 2190    | 13963    | 51026   | 157677   |
| 7.77_133.0682m/z | -   | 5          | M+H         | -                   | -                | 18565             | 40211   | 72567    | 19501   | 32892    | 24960   | 44558    | 16673   | 29489    |
| 8.55_425.8878m/z | -   | 5          | M+2H        | -                   | -                | 18313             | 8469    | 21834    | 81476   | 128975   | 25547   | 64972    | 68425   | 86919    |
| 8.67_538.7325m/z | -   | 5          | M+2H        | -                   | -                | 17071             | 39115   | 64508    | 3423    | 26643    | 5387    | 11944    | 40810   | 118401   |
| 6.94_382.2147m/z | -   | 5          | M+2H        | -                   | -                | 16455             | 229     | 1918     | 16266   | 93405    | 596     | 21564    | 25592   | 43725    |
| 7.67_395.4679m/z | -   | 5          | M+2H        | -                   | -                | 16125             | 4072    | 43302    | 15081   | 81504    | 0       | 6276     | 41169   | 86098    |
| 8.81_556.9466m/z | -   | 5          | M+H         | -                   | -                | 15638             | 49066   | 74049    | 34411   | 71594    | 19538   | 43914    | 66399   | 100860   |
| 8.14_429.7511m/z | -   | 5          | M+2H        | -                   | -                | 15269             | 9400    | 38028    | 13236   | 51942    | 637     | 4049     | 54075   | 94372    |
| 5.44_417.1359m/z | 68  | 3          | M+          | C16H25N4O5PS        | 0.78             | 13861             | 13277   | 92369    | 2738    | 20245    | 968     | 9938     | 21986   | 73645    |
| 6.81_471.7117m/z | -   | 5          | M+2H        | -                   | -                | 13639             | 5090    | 21891    | 12573   | 83546    | 382     | 7700     | 12304   | 46735    |
| 5.54_353.1952m/z | -   | 5          | M+2H        | -                   | -                | 13405             | 22473   | 53441    | 4250    | 23486    | 1982    | 3660     | 20598   | 55925    |
| 4.52_181.1083m/z | 49  | 1          | M+H         | C8H12N4O            | -3.48            | 13169             | 19792   | 53999    | 20048   | 63509    | 31400   | 81259    | 22857   | 67611    |
| 4.76_433.7392m/z | -   | 5          | M+2H        | -                   | -                | 12657             | 18239   | 55224    | 15538   | 79363    | 1980    | 23790    | 28563   | 67983    |
| 6.25_237.2075m/z | -   | 5          | M+H         | -                   | -                | 12600             | 7356    | 12908    | 35560   | 40075    |         |          |         |          |
